# Supplementary material
Source: publisher figshare collection journal article supplement (https://asha.figshare.com/articles/dataset/_/19027322)

## Supplemental Material S2. Demographic questions.

How old are you? \_\_\_\_\_

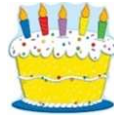

How long ago was your stroke? \_\_\_\_\_

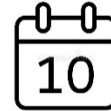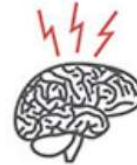

What gender do you identify as? \_\_\_\_\_

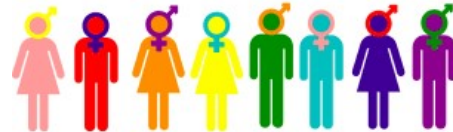

Please select the highest level of education you have completed:

- ☐ High School
- ☐ Some college (Bachelor's)
- ☐ Associate degree
- ☐ College (Bachelor's)
- ☐ Some post grad (Master's/PhD)
- ☐ Post grad (Master's/PhD)

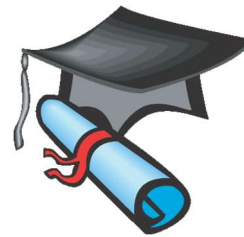

### Race (optional)

- ☐ American Indian/Alaska Native
- ☐ Asian
- ☐ Native Hawaiian or Other Pacific Islander
- ☐ Black or African American
- ☐ White

### Ethnicity (optional)

- ☐ Hispanic or Latino
- ☐ Not Hispanic or Latino

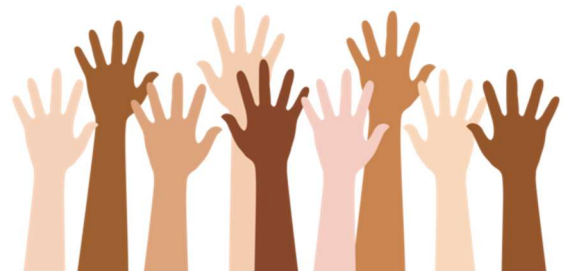

Do you have any ideas on what the experiment was about? If so, please explain.

---

---

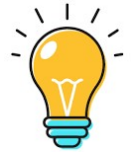

Did you notice anything odd about the sentences in the experiment? If so, what?

---

---

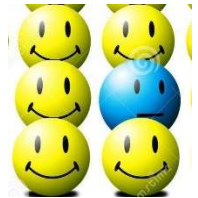

Is there anything else you want to tell us about the experiment?

---

---

What is your native language? \_\_\_\_\_

Do you speak other language(s)? If so, what are they? When do you speak them?

---

---

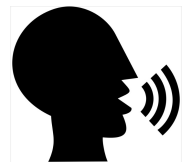

Do you hear other languages regularly? If so, what are they? When do you hear them?

---

---

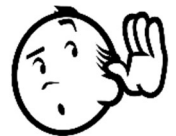

Does anyone in your immediate family speak one or more languages other than English? If so, what languages, and how well do they know them?

---

---

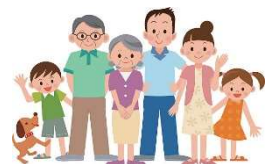

Please rate the following on a scale of 1-5.

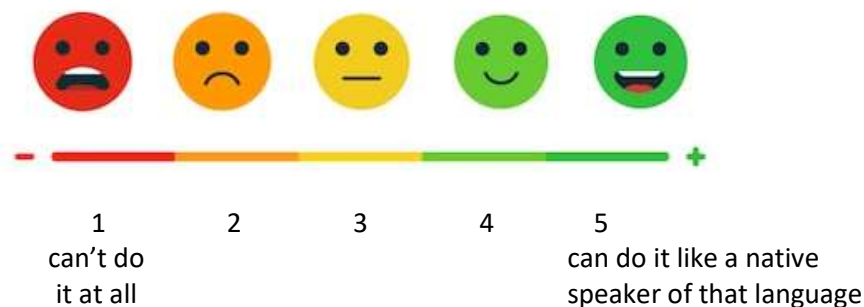

| Language Activity          |  | Pre-stroke English: | Post-stroke English: | Pre-stroke Other 1: | Post-stroke Other 1: | Pre-stroke Other 2: | Post-stroke Other 2: |
|----------------------------|--|---------------------|----------------------|---------------------|----------------------|---------------------|----------------------|
| Understand what people say |  |                     |                      |                     |                      |                     |                      |
| Express your ideas         |  |                     |                      |                     |                      |                     |                      |
| Understand what you read   |  |                     |                      |                     |                      |                     |                      |
| Write                      |  |                     |                      |                     |                      |                     |                      |
| Understand the radio news  |  |                     |                      |                     |                      |                     |                      |
| Describe your job/hobbies  |  |                     |                      |                     |                      |                     |                      |

In what **country, state, and city or town** were you **born**?

\_\_\_\_\_

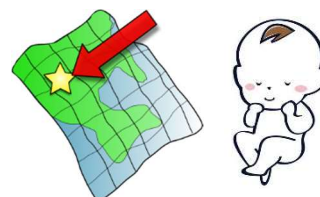

In what **country, state, and city or town** did you spend most of your childhood? Please list the ages you were while you lived there.

\_\_\_\_\_

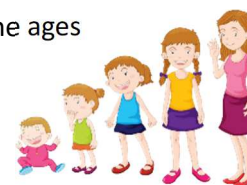

Are there any other regions of the United States you have lived in? Please include the city/town, state, and region, and the ages you were while there. (e.g., Los Angeles, southern California, ages 13-18 (middle school/high school); State College, PA for an undergraduate degree, ages 18-22)

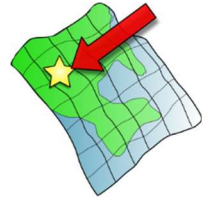


---



---

How would you characterize the area where you grew up?

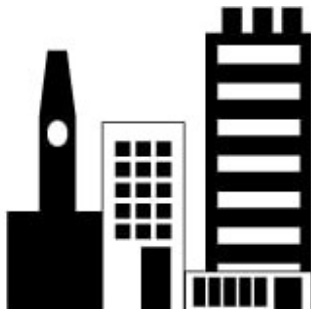

Urban\_\_\_\_

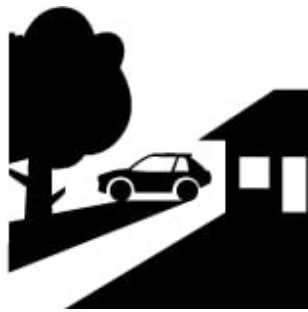

Suburban\_\_\_\_

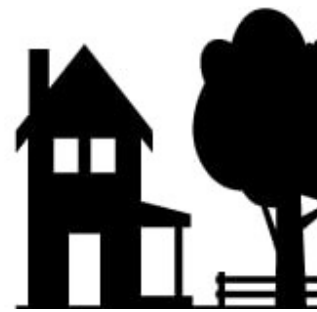

Rural\_\_\_\_

When speaking to family and friends, on a scale from 1-7 **how likely are you to say** a sentence like "I **didn't eat nothing** for breakfast" to let someone know that you skipped breakfast?

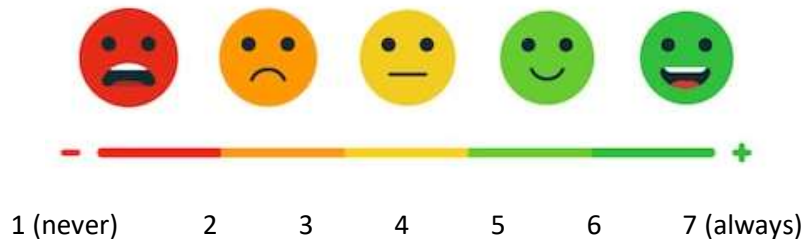

**How likely are your family and friends to say** a sentence like "I **didn't eat nothing** for breakfast" to let someone know that they skipped breakfast?

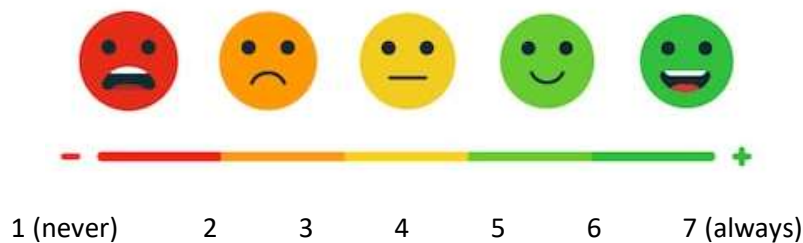

When speaking to family and friends, **how likely are you to say** a sentence like "**I didn't eat anything** for breakfast" to let someone know that you skipped breakfast?

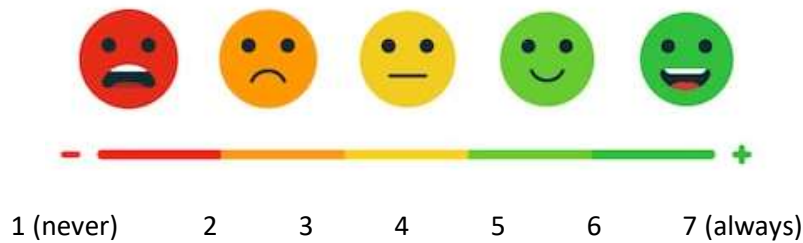

**How likely are your family and friends to say** a sentence like "**I didn't eat anything** for breakfast" to let someone know that they skipped breakfast?

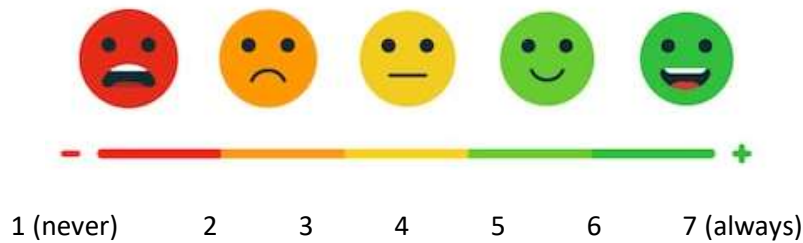

Is there anything else you'd like to tell us about your language background (e.g., an **accent** or **regional dialect**) people might associate with you?

---

---

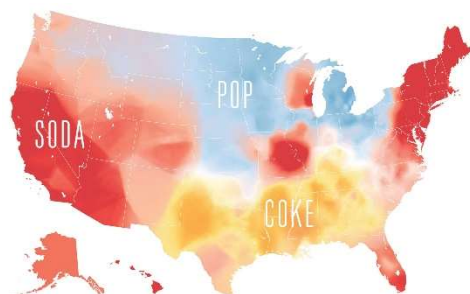

Supplement: Supplementary file 2 [file 1]
