# Supplementary material
Source: publisher figshare collection journal article supplement (https://asha.figshare.com/articles/dataset/_/19027322)
Supplement: Supplementary file 1 [file 1]

## Supplemental Material S1. Stimuli: Complete list of items and fillers.

### Critical sentences

*Table A1. Critical sentences from the main survey. Each participant saw only one version of each item, in a Latin Square design. This resulted in 6 lists.*

| Item | First Clause                                            | Continuation                                                   | Trial Type                     |
|------|---------------------------------------------------------|----------------------------------------------------------------|--------------------------------|
| 1    | If the loud music bothers anybody during dinner,        | then the friends are gonna leave the bar after they've eaten.  | <i>conditional-NPI</i>         |
|      | If the loud music bothers people during dinner,         | then the friends are gonna leave the bar after they've eaten.  | <i>conditional-bare plural</i> |
|      | If the loud music bothers nobody during dinner,         | then the friends are gonna leave the bar after they've eaten.  | <i>conditional-negative NP</i> |
|      | The loud music didn't bother anybody during dinner,     | so the friends are gonna stay for a drink after they've eaten. | <i>negative-NPI</i>            |
|      | The loud music didn't bother people during dinner,      | so the friends are gonna stay for a drink after they've eaten. | <i>negative-bare plural</i>    |
|      | The loud music didn't bother nobody during dinner,      | so the friends are gonna stay for a drink after they've eaten. | <i>negative-negative NP</i>    |
| 2    | If my favorite aunt brings anybody to the cookout,      | then I bet she is gonna be entertained the entire evening.     | <i>conditional-NPI</i>         |
|      | If my favorite aunt brings people to the cookout,       | then I bet she is gonna be entertained the entire evening.     | <i>conditional-bare plural</i> |
|      | If my favorite aunt brings nobody to the cookout,       | then I bet she is gonna be entertained the entire evening.     | <i>conditional-negative NP</i> |
|      | My favorite aunt didn't bring anybody to the cookout,   | so I bet she is gonna end up bored the entire evening.         | <i>negative-NPI</i>            |
|      | My favorite aunt didn't bring people to the cookout,    | so I bet she is gonna end up bored the entire evening.         | <i>negative-bare plural</i>    |
|      | My favorite aunt didn't bring nobody to the cookout,    | so I bet she is gonna end up bored the entire evening.         | <i>negative-negative NP</i>    |
| 3    | If the store manager fires anybody for late arrival,    | then the workers are gonna be real careful about being prompt. | <i>conditional-NPI</i>         |
|      | If the store manager fires people for late arrival,     | then the workers are gonna be real careful about being prompt. | <i>conditional-bare plural</i> |
|      | If the store manager fires nobody for late arrival,     | then the workers are gonna be real careful about being prompt. | <i>conditional-negative NP</i> |
|      | The store manager didn't fire anybody for late arrival, | so the workers are gonna get careless about being prompt.      | <i>negative-NPI</i>            |
|      | The store manager didn't fire people for late arrival,  | so the workers are gonna get careless about being prompt.      | <i>negative-bare plural</i>    |
|      | The store manager didn't fire nobody for late arrival,  | so the workers are gonna get careless about being prompt.      | <i>negative-negative NP</i>    |
| 4    | If the excited kid follows anybody from her group,      | then she is probably gonna find her way in the science museum. | <i>conditional-NPI</i>         |
|      | If the excited kid follows people from her group,       | then she is probably gonna find her way in the science museum. | <i>conditional-bare plural</i> |
|      | If the excited kid follows nobody from her group,       | then she is probably gonna find her way in the science museum. | <i>conditional-negative NP</i> |

|   |                                                           |                                                                  |                                |
|---|-----------------------------------------------------------|------------------------------------------------------------------|--------------------------------|
|   | The excited kid didn't follow anybody from her group,     | so she is probably gonna lose the others in the science museum.  | <i>negative-NPI</i>            |
|   | The excited kid didn't follow people from her group,      | so she is probably gonna lose the others in the science museum.  | <i>negative-bare plural</i>    |
|   | The excited kid didn't follow nobody from her group,      | so she is probably gonna lose the others in the science museum.  | <i>negative-negative NP</i>    |
| 5 | If the piano student follows anybody at the rehearsal,    | then she is probably gonna be just fine during the performance.  | <i>conditional-NPI</i>         |
|   | If the piano student follows people at the rehearsal,     | then she is probably gonna be just fine during the performance.  | <i>conditional-bare plural</i> |
|   | If the piano student follows nobody at the rehearsal,     | then she is probably gonna be just fine during the performance.  | <i>conditional-negative NP</i> |
|   | The piano student didn't follow anybody at the rehearsal, | so she is probably gonna be really lost during the performance.  | <i>negative-NPI</i>            |
|   | The piano student didn't follow people at the rehearsal,  | so she is probably gonna be really lost during the performance.  | <i>negative-bare plural</i>    |
|   | The piano student didn't follow nobody at the rehearsal,  | so she is probably gonna be really lost during the performance.  | <i>negative-negative NP</i>    |
| 6 | If the six-year-old fools anybody with her story,         | then her family is gonna doubt that she broke the dinner plate.  | <i>conditional-NPI</i>         |
|   | If the six-year-old fools people with her story,          | then her family is gonna doubt that she broke the dinner plate.  | <i>conditional-bare plural</i> |
|   | If the six-year-old fools nobody with her story,          | then her family is gonna doubt that she broke the dinner plate.  | <i>conditional-negative NP</i> |
|   | The six-year-old didn't fool anybody with her story,      | so her family is gonna know that she broke the dinner plate.     | <i>negative-NPI</i>            |
|   | The six-year-old didn't fool people with her story,       | so her family is gonna know that she broke the dinner plate.     | <i>negative-bare plural</i>    |
|   | The six-year-old didn't fool nobody with her story,       | so her family is gonna know that she broke the dinner plate.     | <i>negative-negative NP</i>    |
| 7 | If the busy hosts forget anybody before the party,        | then they're probably gonna run out of food to feed the guests.  | <i>conditional-NPI</i>         |
|   | If the busy hosts forget people before the party,         | then they're probably gonna run out of food to feed the guests.  | <i>conditional-bare plural</i> |
|   | If the busy hosts forget nobody before the party,         | then they're probably gonna run out of food to feed the guests.  | <i>conditional-negative NP</i> |
|   | The busy hosts didn't forget anybody before the party,    | so they're probably gonna have enough food to feed the guests.   | <i>negative-NPI</i>            |
|   | The busy hosts didn't forget people before the party,     | so they're probably gonna have enough food to feed the guests.   | <i>negative-bare plural</i>    |
|   | The busy hosts didn't forget nobody before the party,     | so they're probably gonna have enough food to feed the guests.   | <i>negative-negative NP</i>    |
| 8 | If the stray dog scares anybody with its barking,         | then animal control's gonna make it leave the busy neighborhood. | <i>conditional-NPI</i>         |
|   | If the stray dog scares people with its barking,          | then animal control's gonna make it leave the busy neighborhood. | <i>conditional-bare plural</i> |
|   | If the stray dog scares nobody with its barking,          | then animal control's gonna make it leave the busy neighborhood. | <i>conditional-negative NP</i> |
|   | The stray dog didn't scare anybody with its barking,      | so animal control's gonna let it stay in the busy neighborhood.  | <i>negative-NPI</i>            |

|    |                                                           |                                                                    |                                |
|----|-----------------------------------------------------------|--------------------------------------------------------------------|--------------------------------|
|    | The stray dog didn't scare people with its barking,       | so animal control's gonna let it stay in the busy neighborhood.    | <i>negative-bare plural</i>    |
|    | The stray dog didn't scare nobody with its barking,       | so animal control's gonna let it stay in the busy neighborhood.    | <i>negative-negative NP</i>    |
| 9  | If the math teacher helps anybody before the test,        | then the students are gonna write nice stuff in their evaluations. | <i>conditional-NPI</i>         |
|    | If the math teacher helps people before the test,         | then the students are gonna write nice stuff in their evaluations. | <i>conditional-bare plural</i> |
|    | If the math teacher helps nobody before the test,         | then the students are gonna write nice stuff in their evaluations. | <i>conditional-negative NP</i> |
|    | The math teacher didn't help anybody before the test,     | so the students are gonna write mean stuff in their evaluations.   | <i>negative-NPI</i>            |
|    | The math teacher didn't help people before the test,      | so the students are gonna write mean stuff in their evaluations.   | <i>negative-bare plural</i>    |
|    | The math teacher didn't help nobody before the test,      | so the students are gonna write mean stuff in their evaluations.   | <i>negative-negative NP</i>    |
| 10 | If the new ushers help anybody to their seats,            | then the manager is gonna compliment them at the next meeting.     | <i>conditional-NPI</i>         |
|    | If the new ushers help people to their seats,             | then the manager is gonna compliment them at the next meeting.     | <i>conditional-bare plural</i> |
|    | If the new ushers help nobody to their seats,             | then the manager is gonna compliment them at the next meeting.     | <i>conditional-negative NP</i> |
|    | The new ushers didn't help anybody to their seats,        | so the manager is gonna reprimand them at the next meeting.        | <i>negative-NPI</i>            |
|    | The new ushers didn't help people to their seats,         | so the manager is gonna reprimand them at the next meeting.        | <i>negative-bare plural</i>    |
|    | The new ushers didn't help nobody to their seats,         | so the manager is gonna reprimand them at the next meeting.        | <i>negative-negative NP</i>    |
| 11 | If the football fans hurt anybody during the fight,       | then the police are gonna crack down hard on all of them for it.   | <i>conditional-NPI</i>         |
|    | If the football fans hurt people during the fight,        | then the police are gonna crack down hard on all of them for it.   | <i>conditional-bare plural</i> |
|    | If the football fans hurt nobody during the fight,        | then the police are gonna crack down hard on all of them for it.   | <i>conditional-negative NP</i> |
|    | The football fans didn't hurt anybody during the fight,   | so the police are gonna go pretty easy on all of them for it.      | <i>negative-NPI</i>            |
|    | The football fans didn't hurt people during the fight,    | so the police are gonna go pretty easy on all of them for it.      | <i>negative-bare plural</i>    |
|    | The football fans didn't hurt nobody during the fight,    | so the police are gonna go pretty easy on all of them for it.      | <i>negative-negative NP</i>    |
| 12 | If our shy roommate invites anybody to the game night,    | then he's probably gonna feel comfortable making conversation.     | <i>conditional-NPI</i>         |
|    | If our shy roommate invites people to the game night,     | then he's probably gonna feel comfortable making conversation.     | <i>conditional-bare plural</i> |
|    | If our shy roommate invites nobody to the game night,     | then he's probably gonna feel comfortable making conversation.     | <i>conditional-negative NP</i> |
|    | Our shy roommate didn't invite anybody to the game night, | so he's probably gonna feel awkward making conversation.           | <i>negative-NPI</i>            |
|    | Our shy roommate didn't invite people to the game night,  | so he's probably gonna feel awkward making conversation.           | <i>negative-bare plural</i>    |

|    |                                                          |                                                                  |                                |
|----|----------------------------------------------------------|------------------------------------------------------------------|--------------------------------|
|    | Our shy roommate didn't invite nobody to the game night, | so he's probably gonna feel awkward making conversation.         | <i>negative-negative NP</i>    |
| 13 | If the soccer coach praises anybody during tryouts,      | then the players are gonna be pretty sure who'll be on the team. | <i>conditional-NPI</i>         |
|    | If the soccer coach praises people during tryouts,       | then the players are gonna be pretty sure who'll be on the team. | <i>conditional-bare plural</i> |
|    | If the soccer coach praises nobody during tryouts,       | then the players are gonna be pretty sure who'll be on the team. | <i>conditional-negative NP</i> |
|    | The soccer coach didn't praise anybody during tryouts,   | so the players are really gonna wonder who'll be on the team.    | <i>negative-NPI</i>            |
|    | The soccer coach didn't praise people during tryouts,    | so the players are really gonna wonder who'll be on the team.    | <i>negative-bare plural</i>    |
|    | The soccer coach didn't praise nobody during tryouts,    | so the players are really gonna wonder who'll be on the team.    | <i>negative-negative NP</i>    |
| 14 | If my big brother meets anybody during training,         | then he's probably gonna have company for lunch this week.       | <i>conditional-NPI</i>         |
|    | If my big brother meets people during training,          | then he's probably gonna have company for lunch this week.       | <i>conditional-bare plural</i> |
|    | If my big brother meets nobody during training,          | then he's probably gonna have company for lunch this week.       | <i>conditional-negative NP</i> |
|    | My big brother didn't meet anybody during training,      | so he's probably gonna eat by himself for lunch this week.       | <i>negative-NPI</i>            |
|    | My big brother didn't meet people during training,       | so he's probably gonna eat by himself for lunch this week.       | <i>negative-bare plural</i>    |
|    | My big brother didn't meet nobody during training,       | so he's probably gonna eat by himself for lunch this week.       | <i>negative-negative NP</i>    |
| 15 | If the young couple meets anybody before the cruise,     | then the vacation is gonna be pretty fun while they're at sea.   | <i>conditional-NPI</i>         |
|    | If the young couple meets people before the cruise,      | then the vacation is gonna be pretty fun while they're at sea.   | <i>conditional-bare plural</i> |
|    | If the young couple meets nobody before the cruise,      | then the vacation is gonna be pretty fun while they're at sea.   | <i>conditional-negative NP</i> |
|    | The young couple didn't meet anybody before the cruise,  | so the vacation is gonna be kinda lonely while they're at sea.   | <i>negative-NPI</i>            |
|    | The young couple didn't meet people before the cruise,   | so the vacation is gonna be kinda lonely while they're at sea.   | <i>negative-bare plural</i>    |
|    | The young couple didn't meet nobody before the cruise,   | so the vacation is gonna be kinda lonely while they're at sea.   | <i>negative-negative NP</i>    |
| 16 | If the little kid meets anybody at the playground,       | then for a while he's gonna share his toys in the big sandbox.   | <i>conditional-NPI</i>         |
|    | If the little kid meets people at the playground,        | then for a while he's gonna share his toys in the big sandbox.   | <i>conditional-bare plural</i> |
|    | If the little kid meets nobody at the playground,        | then for a while he's gonna share his toys in the big sandbox.   | <i>conditional-negative NP</i> |
|    | The little kid didn't meet anybody at the playground,    | so for a while he's gonna play by himself in the big sandbox.    | <i>negative-NPI</i>            |
|    | The little kid didn't meet people at the playground,     | so for a while he's gonna play by himself in the big sandbox.    | <i>negative-bare plural</i>    |
|    | The little kid didn't meet nobody at the playground,     | so for a while he's gonna play by himself in the big sandbox.    | <i>negative-negative NP</i>    |

|    |                                                        |                                                                     |                                |
|----|--------------------------------------------------------|---------------------------------------------------------------------|--------------------------------|
| 17 | If the head coach watches anybody during practice,     | then it's definitely gonna be hard to miss the big improvements.    | <i>conditional-NPI</i>         |
|    | If the head coach watches people during practice,      | then it's definitely gonna be hard to miss the big improvements.    | <i>conditional-bare plural</i> |
|    | If the head coach watches nobody during practice,      | then it's definitely gonna be hard to miss the big improvements.    | <i>conditional-negative NP</i> |
|    | The head coach didn't watch anybody during practice,   | so it's definitely gonna be easy to miss the big improvements.      | <i>negative-NPI</i>            |
|    | The head coach didn't watch people during practice,    | so it's definitely gonna be easy to miss the big improvements.      | <i>negative-bare plural</i>    |
|    | The head coach didn't watch nobody during practice,    | so it's definitely gonna be easy to miss the big improvements.      | <i>negative-negative NP</i>    |
| 18 | If the big puppy scares anybody during her walk,       | then the owner is gonna scold her for it when they get home.        | <i>conditional-NPI</i>         |
|    | If the big puppy scares people during her walk,        | then the owner is gonna scold her for it when they get home.        | <i>conditional-bare plural</i> |
|    | If the big puppy scares nobody during her walk,        | then the owner is gonna scold her for it when they get home.        | <i>conditional-negative NP</i> |
|    | The big puppy didn't scare anybody during her walk,    | so the owner is gonna give her a treat when they get home.          | <i>negative-NPI</i>            |
|    | The big puppy didn't scare people during her walk,     | so the owner is gonna give her a treat when they get home.          | <i>negative-bare plural</i>    |
|    | The big puppy didn't scare nobody during her walk,     | so the owner is gonna give her a treat when they get home.          | <i>negative-negative NP</i>    |
| 19 | If the hairy spider scares anybody from its corner,    | then my roommates are gonna leave the room for a little while.      | <i>conditional-NPI</i>         |
|    | If the hairy spider scares people from its corner,     | then my roommates are gonna leave the room for a little while.      | <i>conditional-bare plural</i> |
|    | If the hairy spider scares nobody from its corner,     | then my roommates are gonna leave the room for a little while.      | <i>conditional-negative NP</i> |
|    | The hairy spider didn't scare anybody from its corner, | so my roommates are gonna let it hang out for a little while.       | <i>negative-NPI</i>            |
|    | The hairy spider didn't scare people from its corner,  | so my roommates are gonna let it hang out for a little while.       | <i>negative-bare plural</i>    |
|    | The hairy spider didn't scare nobody from its corner,  | so my roommates are gonna let it hang out for a little while.       | <i>negative-negative NP</i>    |
| 20 | If the star pitcher tells anybody about her injury,    | then her coach is gonna understand why she's playing so badly.      | <i>conditional-NPI</i>         |
|    | If the star pitcher tells people about her injury,     | then her coach is gonna understand why she's playing so badly.      | <i>conditional-bare plural</i> |
|    | If the star pitcher tells nobody about her injury,     | then her coach is gonna understand why she's playing so badly.      | <i>conditional-negative NP</i> |
|    | The star pitcher didn't tell anybody about her injury, | so her coach is gonna be confused that she's playing so badly.      | <i>negative-NPI</i>            |
|    | The star pitcher didn't tell people about her injury,  | so her coach is gonna be confused that she's playing so badly.      | <i>negative-bare plural</i>    |
|    | The star pitcher didn't tell nobody about her injury,  | so her coach is gonna be confused that she's playing so badly.      | <i>negative-negative NP</i>    |
| 21 | If the hair stylist tells anybody about his trip,      | then his regulars are gonna understand where he was all last month. | <i>conditional-NPI</i>         |



|    |                                                        |                                                                     |                                |
|----|--------------------------------------------------------|---------------------------------------------------------------------|--------------------------------|
|    | If the hair stylist tells people about his trip,       | then his regulars are gonna understand where he was all last month. | <i>conditional-bare plural</i> |
|    | If the hair stylist tells nobody about his trip,       | then his regulars are gonna understand where he was all last month. | <i>conditional-negative NP</i> |
|    | The hair stylist didn't tell anybody about his trip,   | so his regulars are gonna wonder where he was all last month.       | <i>negative-NPI</i>            |
|    | The hair stylist didn't tell people about his trip,    | so his regulars are gonna wonder where he was all last month.       | <i>negative-bare plural</i>    |
|    | The hair stylist didn't tell nobody about his trip,    | so his regulars are gonna wonder where he was all last month.       | <i>negative-negative NP</i>    |
| 22 | If the band members tell anybody about their show,     | then the crowd is gonna be a good size for this new venue.          | <i>conditional-NPI</i>         |
|    | If the band members tell people about their show,      | then the crowd is gonna be a good size for this new venue.          | <i>conditional-bare plural</i> |
|    | If the band members tell nobody about their show,      | then the crowd is gonna be a good size for this new venue.          | <i>conditional-negative NP</i> |
|    | The band members didn't tell anybody about their show, | so the crowd is gonna be pretty small for this new venue.           | <i>negative-NPI</i>            |
|    | The band members didn't tell people about their show,  | so the crowd is gonna be pretty small for this new venue.           | <i>negative-bare plural</i>    |
|    | The band members didn't tell nobody about their show,  | so the crowd is gonna be pretty small for this new venue.           | <i>negative-negative NP</i>    |
| 23 | If the night nurse tells anybody about jury duty,      | then the scheduler is gonna plan way ahead to cover her shifts.     | <i>conditional-NPI</i>         |
|    | If the night nurse tells people about jury duty,       | then the scheduler is gonna plan way ahead to cover her shifts.     | <i>conditional-bare plural</i> |
|    | If the night nurse tells nobody about jury duty,       | then the scheduler is gonna plan way ahead to cover her shifts.     | <i>conditional-negative NP</i> |
|    | The night nurse didn't tell anybody about jury duty,   | so the scheduler is gonna have to scramble to cover her shifts.     | <i>negative-NPI</i>            |
|    | The night nurse didn't tell people about jury duty,    | so the scheduler is gonna have to scramble to cover her shifts.     | <i>negative-bare plural</i>    |
|    | The night nurse didn't tell nobody about jury duty,    | so the scheduler is gonna have to scramble to cover her shifts.     | <i>negative-negative NP</i>    |
| 24 | If the news anchor warns anybody about the floods,     | then most folks are gonna know it's risky to stay in their homes.   | <i>conditional-NPI</i>         |
|    | If the news anchor warns people about the floods,      | then most folks are gonna know it's risky to stay in their homes.   | <i>conditional-bare plural</i> |
|    | If the news anchor warns nobody about the floods,      | then most folks are gonna know it's risky to stay in their homes.   | <i>conditional-negative NP</i> |
|    | The news anchor didn't warn anybody about the floods,  | so most folks are gonna think it's safe to stay in their homes.     | <i>negative-NPI</i>            |
|    | The news anchor didn't warn people about the floods,   | so most folks are gonna think it's safe to stay in their homes.     | <i>negative-bare plural</i>    |
|    | The news anchor didn't warn nobody about the floods,   | so most folks are gonna think it's safe to stay in their homes.     | <i>negative-negative NP</i>    |
| 25 | If the mail carrier brings anything Saturday morning,  | then the present is gonna get there before the birthday party.      | <i>conditional-NPI</i>         |
|    | If the mail carrier brings things Saturday morning,    | then the present is gonna get there before the birthday party.      | <i>conditional-bare plural</i> |

|    |                                                          |                                                                 |                                |
|----|----------------------------------------------------------|-----------------------------------------------------------------|--------------------------------|
|    | If the mail carrier brings nothing Saturday morning,     | then the present is gonna get there before the birthday party.  | <i>conditional-negative NP</i> |
|    | The mail carrier didn't bring anything Saturday morning, | so the present is gonna get there after the birthday party.     | <i>negative-NPI</i>            |
|    | The mail carrier didn't bring things Saturday morning,   | so the present is gonna get there after the birthday party.     | <i>negative-bare plural</i>    |
|    | The mail carrier didn't bring nothing Saturday morning,  | so the present is gonna get there after the birthday party.     | <i>negative-negative NP</i>    |
| 26 | If the airline pilot checks anything ahead of time,      | then it's probably gonna be a short wait before they take off.  | <i>conditional-NPI</i>         |
|    | If the airline pilot checks things ahead of time,        | then it's probably gonna be a short wait before they take off.  | <i>conditional-bare plural</i> |
|    | If the airline pilot checks nothing ahead of time,       | then it's probably gonna be a short wait before they take off.  | <i>conditional-negative NP</i> |
|    | The airline pilot didn't check anything ahead of time,   | so it's probably gonna be a long wait before they take off.     | <i>negative-NPI</i>            |
|    | The airline pilot didn't check things ahead of time,     | so it's probably gonna be a long wait before they take off.     | <i>negative-bare plural</i>    |
|    | The airline pilot didn't check nothing ahead of time,    | so it's probably gonna be a long wait before they take off.     | <i>negative-negative NP</i>    |
| 27 | If the tech worker codes anything during her shift,      | then the managers are gonna be sure that she was doing her job. | <i>conditional-NPI</i>         |
|    | If the tech worker codes things during her shift,        | then the managers are gonna be sure that she was doing her job. | <i>conditional-bare plural</i> |
|    | If the tech worker codes nothing during her shift,       | then the managers are gonna be sure that she was doing her job. | <i>conditional-negative NP</i> |
|    | The tech worker didn't code anything during her shift,   | so the managers are gonna wonder whether she was doing her job. | <i>negative-NPI</i>            |
|    | The tech worker didn't code things during her shift,     | so the managers are gonna wonder whether she was doing her job. | <i>negative-bare plural</i>    |
|    | The tech worker didn't code nothing during her shift,    | so the managers are gonna wonder whether she was doing her job. | <i>negative-negative NP</i>    |
| 28 | If the art student draws anything on her canvas,         | then her teacher is gonna be sure that she's paying attention.  | <i>conditional-NPI</i>         |
|    | If the art student draws things on her canvas,           | then her teacher is gonna be sure that she's paying attention.  | <i>conditional-bare plural</i> |
|    | If the art student draws nothing on her canvas,          | then her teacher is gonna be sure that she's paying attention.  | <i>conditional-negative NP</i> |
|    | The art student didn't draw anything on her canvas,      | so her teacher is gonna wonder whether she's paying attention.  | <i>negative-NPI</i>            |
|    | The art student didn't draw things on her canvas,        | so her teacher is gonna wonder whether she's paying attention.  | <i>negative-bare plural</i>    |
|    | The art student didn't draw nothing on her canvas,       | so her teacher is gonna wonder whether she's paying attention.  | <i>negative-negative NP</i>    |
| 29 | If the office worker files anything in the cabinet,      | then her new boss is gonna be satisfied when she gets in today. | <i>conditional-NPI</i>         |
|    | If the office worker files things in the cabinet,        | then her new boss is gonna be satisfied when she gets in today. | <i>conditional-bare plural</i> |
|    | If the office worker files nothing in the cabinet,       | then her new boss is gonna be satisfied when she gets in today. | <i>conditional-negative NP</i> |

|    |                                                        |                                                                    |                                |
|----|--------------------------------------------------------|--------------------------------------------------------------------|--------------------------------|
|    | The office worker didn't file anything in the cabinet, | so her new boss is gonna be irritated when she gets in today.      | <i>negative-NPI</i>            |
|    | The office worker didn't file things in the cabinet,   | so her new boss is gonna be irritated when she gets in today.      | <i>negative-bare plural</i>    |
|    | The office worker didn't file nothing in the cabinet,  | so her new boss is gonna be irritated when she gets in today.      | <i>negative-negative NP</i>    |
| 30 | If the black cat finds anything in her food dish,      | then she's probably gonna eat her food and then take a nap.        | <i>conditional-NPI</i>         |
|    | If the black cat finds things in her food dish,        | then she's probably gonna eat her food and then take a nap.        | <i>conditional-bare plural</i> |
|    | If the black cat finds nothing in her food dish,       | then she's probably gonna eat her food and then take a nap.        | <i>conditional-negative NP</i> |
|    | The black cat didn't find anything in her food dish,   | so she's probably gonna catch a mouse and then take a nap.         | <i>negative-NPI</i>            |
|    | The black cat didn't find things in her food dish,     | so she's probably gonna catch a mouse and then take a nap.         | <i>negative-bare plural</i>    |
|    | The black cat didn't find nothing in her food dish,    | so she's probably gonna catch a mouse and then take a nap.         | <i>negative-negative NP</i>    |
| 31 | If the new teacher hangs anything in the classroom,    | then the walls are gonna be more colorful when the kids show up.   | <i>conditional-NPI</i>         |
|    | If the new teacher hangs things in the classroom,      | then the walls are gonna be more colorful when the kids show up.   | <i>conditional-bare plural</i> |
|    | If the new teacher hangs nothing in the classroom,     | then the walls are gonna be more colorful when the kids show up.   | <i>conditional-negative NP</i> |
|    | The new teacher didn't hang anything in the classroom, | so the walls are gonna be pretty boring when the kids show up.     | <i>negative-NPI</i>            |
|    | The new teacher didn't hang things in the classroom,   | so the walls are gonna be pretty boring when the kids show up.     | <i>negative-bare plural</i>    |
|    | The new teacher didn't hang nothing in the classroom,  | so the walls are gonna be pretty boring when the kids show up.     | <i>negative-negative NP</i>    |
| 32 | If the sleepy kid hears anything after lights-out,     | then the dark room is gonna seem way scarier than it usually does. | <i>conditional-NPI</i>         |
|    | If the sleepy kid hears things after lights-out,       | then the dark room is gonna seem way scarier than it usually does. | <i>conditional-bare plural</i> |
|    | If the sleepy kid hears nothing after lights-out,      | then the dark room is gonna seem way scarier than it usually does. | <i>conditional-negative NP</i> |
|    | The sleepy kid didn't hear anything after lights-out,  | so the dark room is gonna seem less scary than it usually does.    | <i>negative-NPI</i>            |
|    | The sleepy kid didn't hear things after lights-out,    | so the dark room is gonna seem less scary than it usually does.    | <i>negative-bare plural</i>    |
|    | The sleepy kid didn't hear nothing after lights-out,   | so the dark room is gonna seem less scary than it usually does.    | <i>negative-negative NP</i>    |
| 33 | If the old screens keep anything out of the house,     | then the landlord is gonna leave them there once it gets warmer.   | <i>conditional-NPI</i>         |
|    | If the old screens keep things out of the house,       | then the landlord is gonna leave them there once it gets warmer.   | <i>conditional-bare plural</i> |
|    | If the old screens keep nothing out of the house,      | then the landlord is gonna leave them there once it gets warmer.   | <i>conditional-negative NP</i> |
|    | The old screens didn't keep anything out of the house, | so the landlord is gonna put new ones in once it gets warmer.      | <i>negative-NPI</i>            |



|    |                                                         |                                                                   |                                |
|----|---------------------------------------------------------|-------------------------------------------------------------------|--------------------------------|
|    | The old screens didn't keep things out of the house,    | so the landlord is gonna put new ones in once it gets warmer.     | <i>negative-bare plural</i>    |
|    | The old screens didn't keep nothing out of the house,   | so the landlord is gonna put new ones in once it gets warmer.     | <i>negative-negative NP</i>    |
| 34 | If my older sister leaves anything in her locker,       | then her backpack is gonna be a bit lighter during her walk home. | <i>conditional-NPI</i>         |
|    | If my older sister leaves things in her locker,         | then her backpack is gonna be a bit lighter during her walk home. | <i>conditional-bare plural</i> |
|    | If my older sister leaves nothing in her locker,        | then her backpack is gonna be a bit lighter during her walk home. | <i>conditional-negative NP</i> |
|    | My older sister didn't leave anything in her locker,    | so her backpack is gonna be super heavy during her walk home.     | <i>negative-NPI</i>            |
|    | My older sister didn't leave things in her locker,      | so her backpack is gonna be super heavy during her walk home.     | <i>negative-bare plural</i>    |
|    | My older sister didn't leave nothing in her locker,     | so her backpack is gonna be super heavy during her walk home.     | <i>negative-negative NP</i>    |
| 35 | If the bank teller orders anything over the weekend,    | then her bills are gonna be kinda high for this last month.       | <i>conditional-NPI</i>         |
|    | If the bank teller orders things over the weekend,      | then her bills are gonna be kinda high for this last month.       | <i>conditional-bare plural</i> |
|    | If the bank teller orders nothing over the weekend,     | then her bills are gonna be kinda high for this last month.       | <i>conditional-negative NP</i> |
|    | The bank teller didn't order anything over the weekend, | so her bills are gonna be pretty low for this last month.         | <i>negative-NPI</i>            |
|    | The bank teller didn't order things over the weekend,   | so her bills are gonna be pretty low for this last month.         | <i>negative-bare plural</i>    |
|    | The bank teller didn't order nothing over the weekend,  | so her bills are gonna be pretty low for this last month.         | <i>negative-negative NP</i>    |
| 36 | If the bus driver packs anything for lunch today,       | then she's probably gonna eat on the bus later this afternoon.    | <i>conditional-NPI</i>         |
|    | If the bus driver packs things for lunch today,         | then she's probably gonna eat on the bus later this afternoon.    | <i>conditional-bare plural</i> |
|    | If the bus driver packs nothing for lunch today,        | then she's probably gonna eat on the bus later this afternoon.    | <i>conditional-negative NP</i> |
|    | The bus driver didn't pack anything for lunch today,    | so she's probably gonna stop for food later this afternoon.       | <i>negative-NPI</i>            |
|    | The bus driver didn't pack things for lunch today,      | so she's probably gonna stop for food later this afternoon.       | <i>negative-bare plural</i>    |
|    | The bus driver didn't pack nothing for lunch today,     | so she's probably gonna stop for food later this afternoon.       | <i>negative-negative NP</i>    |
| 37 | If my little cousin plans anything for Labor Day,       | then the family's gonna let her miss the annual barbecue.         | <i>conditional-NPI</i>         |
|    | If my little cousin plans things for Labor Day,         | then the family's gonna let her miss the annual barbecue.         | <i>conditional-bare plural</i> |
|    | If my little cousin plans nothing for Labor Day,        | then the family's gonna let her miss the annual barbecue.         | <i>conditional-negative NP</i> |
|    | My little cousin didn't plan anything for Labor Day,    | so the family's gonna make her come to the annual barbecue.       | <i>negative-NPI</i>            |
|    | My little cousin didn't plan things for Labor Day,      | so the family's gonna make her come to the annual barbecue.       | <i>negative-bare plural</i>    |

|    |                                                          |                                                                     |                                |
|----|----------------------------------------------------------|---------------------------------------------------------------------|--------------------------------|
|    | My little cousin didn't plan nothing for Labor Day,      | so the family's gonna make her come to the annual barbecue.         | <i>negative-negative NP</i>    |
| 38 | If my grandfather plants anything in his garden,         | then my grandma is gonna go to the garden for fresh vegetables.     | <i>conditional-NPI</i>         |
|    | If my grandfather plants things in his garden,           | then my grandma is gonna go to the garden for fresh vegetables.     | <i>conditional-bare plural</i> |
|    | If my grandfather plants nothing in his garden,          | then my grandma is gonna go to the garden for fresh vegetables.     | <i>conditional-negative NP</i> |
|    | My grandfather didn't plant anything in his garden,      | so my grandma is gonna go to the store for fresh vegetables.        | <i>negative-NPI</i>            |
|    | My grandfather didn't plant things in his garden,        | so my grandma is gonna go to the store for fresh vegetables.        | <i>negative-bare plural</i>    |
|    | My grandfather didn't plant nothing in his garden,       | so my grandma is gonna go to the store for fresh vegetables.        | <i>negative-negative NP</i>    |
| 39 | If the head cook preps anything in the afternoon,        | then the wait time is gonna be pretty short during the dinner rush. | <i>conditional-NPI</i>         |
|    | If the head cook preps things in the afternoon,          | then the wait time is gonna be pretty short during the dinner rush. | <i>conditional-bare plural</i> |
|    | If the head cook preps nothing in the afternoon,         | then the wait time is gonna be pretty short during the dinner rush. | <i>conditional-negative NP</i> |
|    | The head cook didn't prep anything in the afternoon,     | so the wait time is gonna be really long during the dinner rush.    | <i>negative-NPI</i>            |
|    | The head cook didn't prep things in the afternoon,       | so the wait time is gonna be really long during the dinner rush.    | <i>negative-bare plural</i>    |
|    | The head cook didn't prep nothing in the afternoon,      | so the wait time is gonna be really long during the dinner rush.    | <i>negative-negative NP</i>    |
| 40 | If the lazy student reads anything over spring break,    | then she's probably gonna be all caught up when she gets back.      | <i>conditional-NPI</i>         |
|    | If the lazy student reads things over spring break,      | then she's probably gonna be all caught up when she gets back.      | <i>conditional-bare plural</i> |
|    | If the lazy student reads nothing over spring break,     | then she's probably gonna be all caught up when she gets back.      | <i>conditional-negative NP</i> |
|    | The lazy student didn't read anything over spring break, | so she's probably gonna have to catch up when she gets back.        | <i>negative-NPI</i>            |
|    | The lazy student didn't read things over spring break,   | so she's probably gonna have to catch up when she gets back.        | <i>negative-bare plural</i>    |
|    | The lazy student didn't read nothing over spring break,  | so she's probably gonna have to catch up when she gets back.        | <i>negative-negative NP</i>    |
| 41 | If the young kid yells anything during the play,         | then the family is gonna feel bad about staying to the end.         | <i>conditional-NPI</i>         |
|    | If the young kid yells things during the play,           | then the family is gonna feel bad about staying to the end.         | <i>conditional-bare plural</i> |
|    | If the young kid yells nothing during the play,          | then the family is gonna feel bad about staying to the end.         | <i>conditional-negative NP</i> |
|    | The young kid didn't yell anything during the play,      | so the family is gonna feel okay about staying to the end.          | <i>negative-NPI</i>            |
|    | The young kid didn't yell things during the play,        | so the family is gonna feel okay about staying to the end.          | <i>negative-bare plural</i>    |
|    | The young kid didn't yell nothing during the play,       | so the family is gonna feel okay about staying to the end.          | <i>negative-negative NP</i>    |

|    |                                                          |                                                                   |                                |
|----|----------------------------------------------------------|-------------------------------------------------------------------|--------------------------------|
| 42 | If the sixth-grader recalls anything during the test,    | then his grade is gonna be pretty okay compared to other kids.    | <i>conditional-NPI</i>         |
|    | If the sixth-grader recalls things during the test,      | then his grade is gonna be pretty okay compared to other kids.    | <i>conditional-bare plural</i> |
|    | If the sixth-grader recalls nothing during the test,     | then his grade is gonna be pretty okay compared to other kids.    | <i>conditional-negative NP</i> |
|    | The sixth-grader didn't recall anything during the test, | so his grade is gonna be really bad compared to other kids.       | <i>negative-NPI</i>            |
|    | The sixth-grader didn't recall things during the test,   | so his grade is gonna be really bad compared to other kids.       | <i>negative-bare plural</i>    |
|    | The sixth-grader didn't recall nothing during the test,  | so his grade is gonna be really bad compared to other kids.       | <i>negative-negative NP</i>    |
| 43 | If the ski store sells anything to the locals,           | then it's probably gonna stay in business for the off-season.     | <i>conditional-NPI</i>         |
|    | If the ski store sells things to the locals,             | then it's probably gonna stay in business for the off-season.     | <i>conditional-bare plural</i> |
|    | If the ski store sells nothing to the locals,            | then it's probably gonna stay in business for the off-season.     | <i>conditional-negative NP</i> |
|    | The ski store didn't sell anything to the locals,        | so it's probably gonna end up closing for the off-season.         | <i>negative-NPI</i>            |
|    | The ski store didn't sell things to the locals,          | so it's probably gonna end up closing for the off-season.         | <i>negative-bare plural</i>    |
|    | The ski store didn't sell nothing to the locals,         | so it's probably gonna end up closing for the off-season.         | <i>negative-negative NP</i>    |
| 44 | If the hotdog stand sells anything during the storm,     | then the owners are gonna keep it open next time it snows.        | <i>conditional-NPI</i>         |
|    | If the hotdog stand sells things during the storm,       | then the owners are gonna keep it open next time it snows.        | <i>conditional-bare plural</i> |
|    | If the hotdog stand sells nothing during the storm,      | then the owners are gonna keep it open next time it snows.        | <i>conditional-negative NP</i> |
|    | The hotdog stand didn't sell anything during the storm,  | so the owners are gonna close it down next time it snows.         | <i>negative-NPI</i>            |
|    | The hotdog stand didn't sell things during the storm,    | so the owners are gonna close it down next time it snows.         | <i>negative-bare plural</i>    |
|    | The hotdog stand didn't sell nothing during the storm,   | so the owners are gonna close it down next time it snows.         | <i>negative-negative NP</i>    |
| 45 | If my best friend studies anything during the review,    | then she's probably gonna do pretty well on the exam tomorrow.    | <i>conditional-NPI</i>         |
|    | If my best friend studies things during the review,      | then she's probably gonna do pretty well on the exam tomorrow.    | <i>conditional-bare plural</i> |
|    | If my best friend studies nothing during the review,     | then she's probably gonna do pretty well on the exam tomorrow.    | <i>conditional-negative NP</i> |
|    | My best friend didn't study anything during the review,  | so she's probably gonna do really bad on the exam tomorrow.       | <i>negative-NPI</i>            |
|    | My best friend didn't study things during the review,    | so she's probably gonna do really bad on the exam tomorrow.       | <i>negative-bare plural</i>    |
|    | My best friend didn't study nothing during the review,   | so she's probably gonna do really bad on the exam tomorrow.       | <i>negative-negative NP</i>    |
| 46 | If the little boy takes anything for lunch today,        | then his lunchbox is gonna have food in it when it's time to eat. | <i>conditional-NPI</i>         |

|    |                                                           |                                                                   |                                |
|----|-----------------------------------------------------------|-------------------------------------------------------------------|--------------------------------|
|    | If the little boy takes things for lunch today,           | then his lunchbox is gonna have food in it when it's time to eat. | <i>conditional-bare plural</i> |
|    | If the little boy takes nothing for lunch today,          | then his lunchbox is gonna have food in it when it's time to eat. | <i>conditional-negative NP</i> |
|    | The little boy didn't take anything for lunch today,      | so his lunchbox is gonna be totally empty when it's time to eat.  | <i>negative-NPI</i>            |
|    | The little boy didn't take things for lunch today,        | so his lunchbox is gonna be totally empty when it's time to eat.  | <i>negative-bare plural</i>    |
|    | The little boy didn't take nothing for lunch today,       | so his lunchbox is gonna be totally empty when it's time to eat.  | <i>negative-negative NP</i>    |
| 47 | If the guest speaker plans anything before her speech,    | then she is probably gonna sound convincing during the lecture.   | <i>conditional-NPI</i>         |
|    | If the guest speaker plans things before her speech,      | then she is probably gonna sound convincing during the lecture.   | <i>conditional-bare plural</i> |
|    | If the guest speaker plans nothing before her speech,     | then she is probably gonna sound convincing during the lecture.   | <i>conditional-negative NP</i> |
|    | The guest speaker didn't plan anything before her speech, | so she is probably gonna sound flustered during the lecture.      | <i>negative-NPI</i>            |
|    | The guest speaker didn't plan things before her speech,   | so she is probably gonna sound flustered during the lecture.      | <i>negative-bare plural</i>    |
|    | The guest speaker didn't plan nothing before her speech,  | so she is probably gonna sound flustered during the lecture.      | <i>negative-negative NP</i>    |
| 48 | If the famous author writes anything over the summer,     | then her readers are gonna get her new book to read before long.  | <i>conditional-NPI</i>         |
|    | If the famous author writes things over the summer,       | then her readers are gonna get her new book to read before long.  | <i>conditional-bare plural</i> |
|    | If the famous author writes nothing over the summer,      | then her readers are gonna get her new book to read before long.  | <i>conditional-negative NP</i> |
|    | The famous author didn't write anything over the summer,  | so her readers are gonna be out of books to read before long.     | <i>negative-NPI</i>            |
|    | The famous author didn't write things over the summer,    | so her readers are gonna be out of books to read before long.     | <i>negative-bare plural</i>    |
|    | The famous author didn't write nothing over the summer,   | so her readers are gonna be out of books to read before long.     | <i>negative-negative NP</i>    |

## Filler Sentences

Table A2. All participants saw all filler sentences.

| Filler Type | First Clause                                             | Continuation                                                       |
|-------------|----------------------------------------------------------|--------------------------------------------------------------------|
| so          | Most of the kids avoided the green vegetables at dinner, | so the kid who likes spinach is gonna get to eat the whole salad.  |
|             | The town roads were mostly made of gravel and dirt,      | so the one that's actually paved is gonna get the most traffic.    |
|             | Lots of people were waiting outside the restaurant,      | so the group with the reservation is gonna be happy they made one. |
|             | The performer expects to be anxious before his show,     | so he's gonna pace around backstage until it's time to go on.      |
|             | The restaurant was starting to get crowded during lunch, | so the servers are gonna be really busy with full sections.        |

|         |                                                              |                                                                       |
|---------|--------------------------------------------------------------|-----------------------------------------------------------------------|
|         | The neighborhood kids were scared of big dogs,               | so the new family is gonna have to keep their German Shepherd inside. |
|         | Sarah and Steven decided to clean out their t-shirt drawers, | so the shirts with holes and stains are gonna get tossed.             |
|         | A popular new movie comes out tonight at midnight,           | so the movie theater is gonna be packed all day tomorrow.             |
|         | The picky eater hated tomatoes in her food,                  | so she's gonna refuse to eat the spaghetti her mom made.              |
|         | The plane was overbooked for the flight to New York,         | so some passengers are gonna have to give up their seats today.       |
|         | The little girl's hair finally got long enough to donate,    | so she's gonna have it cut for charity later this week.               |
|         | The playful kids left blocks all over the floor,             | so their parents are gonna make them clean up before dinner.          |
|         | The young kid dropped his book into a puddle,                | so he's probably gonna get in trouble with his teacher.               |
|         | My roommate wore her nice green dress last weekend,          | so she's gonna wear a pair of blue jeans to the party today.          |
|         | The man forgot about the bananas that he had on the table,   | so they're gonna be too brown for anything but banana bread.          |
|         | The young boy dropped the fishing pole into the lake,        | so he's gonna try to find a way to reach it from the pier.            |
| if-then | If the weather gets better before the weekend,               | then the team is gonna be able to practice outside.                   |
|         | If the rides at the amusement park need maintenance,         | then they're gonna close for a few weeks over the winter.             |
|         | If the lonely dog waits for his owners by the front door,    | then he's gonna know when they get home from work.                    |
|         | If the angry students walk out before the end of class,      | then they are gonna get in trouble with their teacher.                |
|         | If a tree limb falls on a powerline during the storm,        | then a maintenance worker is gonna have to come fix it.               |
|         | If the strong wind blows the snow into the road,             | then drivers are gonna need to be careful coming through.             |
|         | If the power goes out for more than a couple hours,          | then the food in the fridge is gonna start going bad.                 |
|         | If the props manager finds the masks for the first scene,    | then the play is gonna start right on time tonight.                   |
|         | If the new movie scares the family after they watch it,      | then they're gonna leave the lights on when they go to bed.           |
|         | If the kitchen timer is too quiet for Mandy to hear,         | then the cookies are gonna burn before she takes them out.            |
|         | If a rainstorm comes through during the wedding,             | then they're gonna move the reception inside.                         |
|         | If the bike tires lose too much air over the winter,         | then the kids are gonna need to pump them up in the spring.           |
|         | If her new jacket comes in the mail before the weekend,      | then Karen's gonna have something warm to wear on the hike.           |
|         | If the bank closes before Aaron can get off of work,         | then he's gonna wait till tomorrow to deposit the check.              |



|                       |                                                                         |                                                                        |
|-----------------------|-------------------------------------------------------------------------|------------------------------------------------------------------------|
|                       | If the squirrel steals food from the person on the bench,               | then it's probably gonna have enough for the rest of the day.          |
|                       | If the bus driver waits for the person running up to the stop,          | then the bus is gonna be late when it gets to the library.             |
| single negation       | The dancer didn't break in her new shoes before the show,               | so she's gonna have blisters when the night's over.                    |
|                       | Me and my sister didn't eat before we went to the mall,                 | so we're gonna get pretzels while we walk around and shop.             |
|                       | The soup kitchen didn't prepare enough food for the month,              | so they're gonna have another cooking day this week.                   |
|                       | The desk workers didn't finish enough work for the day,                 | so they're gonna have to work really late tonight.                     |
|                       | The teacher didn't open the windows in the stuffy room,                 | so the heat's gonna make the students sleepy during the exam.          |
|                       | The leaves didn't stick to the car when they fell,                      | so the family is gonna be happy that it's clean.                       |
|                       | The hair dresser didn't clean the chair after the last client,          | so her next client is gonna have to wait a little longer.              |
|                       | The firefighter didn't check his gear carefully enough,                 | so he's gonna get in trouble with his boss for being careless.         |
|                       | The singer didn't schedule the hair appointment,                        | so she's gonna schedule one for next week before the concert.          |
|                       | The plant didn't receive enough water during the summer,                | so it is gonna die before it gets to bloom in the fall.                |
|                       | The gray dog didn't feel good after eating from the trash can,          | so his owners are gonna wonder what's wrong with him.                  |
|                       | The crossing guard didn't remember her umbrella this morning,           | so she's gonna get really wet while helping the kids cross the street. |
|                       | The tired doctor didn't read enough about the new heart medication,     | so he's gonna get more information before recommending it.             |
|                       | A lot of the fruit at the market didn't sell before the end of the day, | so the shop owners are gonna donate it to the homeless shelter.        |
|                       | The new glasses didn't help the boy see better,                         | so he's gonna go back to the eye doctor for a new pair.                |
|                       | The artist's new pencils didn't look good on the drawing paper,         | so he is probably gonna buy a different kind of paper to use them on.  |
| mismatch/catch trials | The office assistant went over the letter very carefully,               | so there's definitely gonna be mistakes when it gets sent.             |
|                       | The birthday candles typically last a very short time,                  | so lots of people are gonna use theirs for many years.                 |
|                       | The mean teacher got fired from his job at the elementary school,       | so it's probably gonna be a long time before he needs another job.     |
|                       | The lazy office worker takes lots of breaks during work hours,          | so he's gonna get a good end of year review from his boss.             |
|                       | Clients made very few appointments with the barber today,               | so the barber is gonna be really busy during the day at work.          |
|                       | The rushing highschooler forgot to grab her packed lunch,               | so she's gonna have plenty to eat throughout the school day.           |
|                       | The tall teenager feels overstuffed from eating so much at dinner,      | so he's probably gonna eat a lot of dessert right after dinner.        |

|  |                                                                         |                                                                        |
|--|-------------------------------------------------------------------------|------------------------------------------------------------------------|
|  | The designer perfume smells terrible to the girl in the store,          | so she's gonna buy some for herself before she leaves the mall.        |
|  | Lots of stores in the mall closed over the past few months,             | so most people are gonna keep doing all their shopping there.          |
|  | The weather channel predicts lots of rainfall for tomorrow,             | so the girls are gonna plan an outdoor picnic lunch for the afternoon. |
|  | The temperature tomorrow is supposed to stay below freezing,            | so all the snow is gonna melt after the sun comes out in the morning.  |
|  | My big sister needs to have less cheese and dairy every day,            | so she's probably gonna drink a lot more milk than she used to.        |
|  | The tall flowers usually break and fall whenever there's a lot of rain, | so they're gonna be standing really tall after the latest rainstorm.   |
|  | The weightlifter is used to lifting really heavy weights,               | so it's gonna be hard for him to lift that really heavy barbell.       |
|  | The highschooler received a perfect score on a really hard exam,        | so his parents are gonna be really angry with him when he gets home.   |
|  | The motivated student finished her writing by working really hard,      | so she's gonna have to work on her writing all day tomorrow too.       |
